# Supplementary material for: Cost-effective fabrication of submicron-scale patterns enabled by microcontact printing with a pre-strained soft elastomeric stamp
Source: Royal Society of Chemistry journal article supplement (doi:10.1039/d4na00757c), 2025-01-01
Supplement: d4na00757c1.pdf [file d4na00757c1.pdf]

## SUPPLEMENTARY INFORMATION

### Cost-Effective Fabrication of Submicron-Scale Patterns Enabled by Microcontact Printing with a Pre-Strained Soft Elastomeric Stamp

Eunhwan Jo<sup>a</sup> and Jaesam Sim<sup>b\*</sup>

<sup>a</sup> Department of Mechanical Engineering, Kumoh National Institute of Technology, 61  
Daehak-ro, Gumi, Gyeongbuk, 39177, Republic of Korea.

<sup>b</sup> Purpose Built Mobility Group, Korea Institute of Industrial Technology, 6 Cheomdangwagi-  
ro 208 beon-gil, Buk-gu, Gwangju 61012, Republic of Korea.

\*Corresponding author: sjswkd3@kitech.re.kr (JS)

#### **Supplementary Information includes:**

**Figure S1.** An optical image of replicated patterns indicating the loss of the pattern with the adhesive promoter.

**Figure S2.** A tensile stress versus strain curve of an Ecoflex elastomeric stamp.

**Figure S3.** Optical microscope images of the PR pattern on the master mold with a periodic line pattern

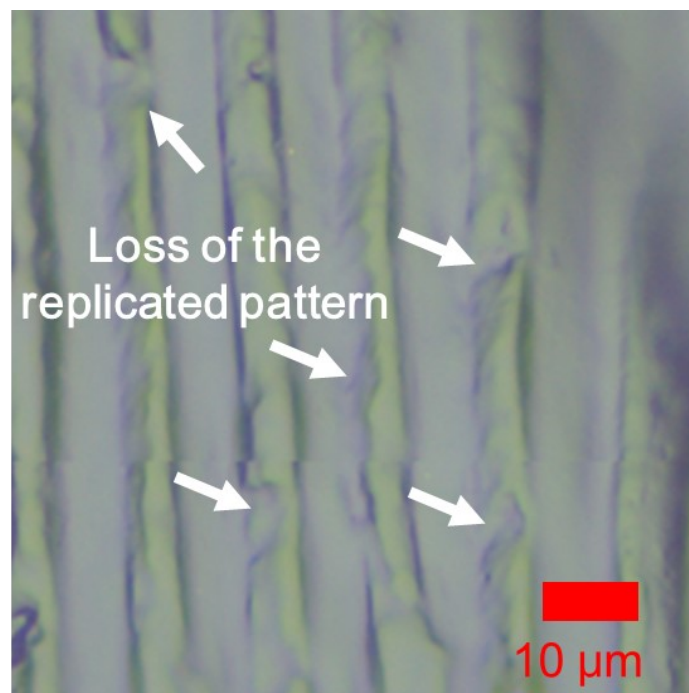

**Figure S1.** An optical image of replicated patterns indicating the loss of the pattern with the adhesive promoter.

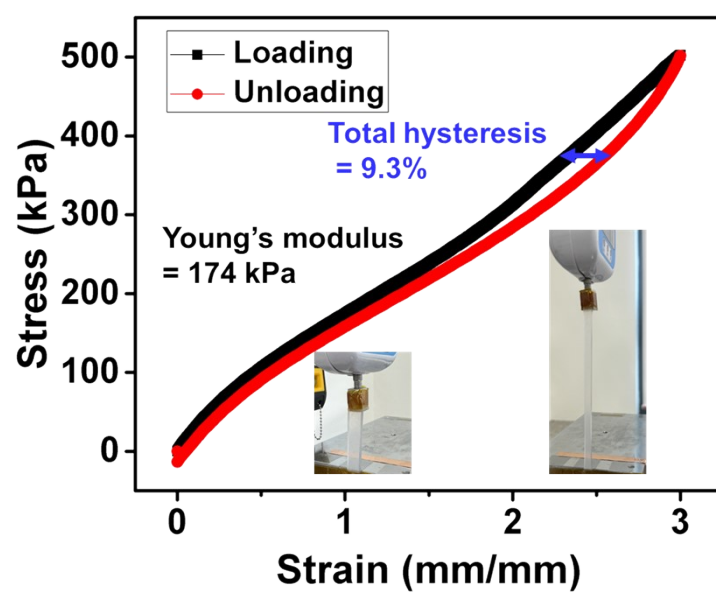

**Figure S2.** A tensile stress versus strain curve of an Ecoflex elastomeric stamp.

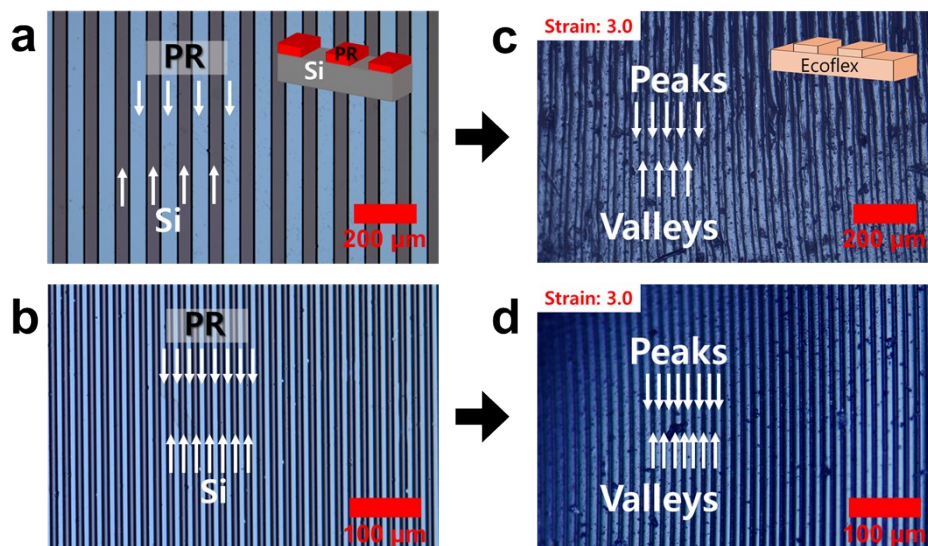

**Figure S3.** Optical microscope images of the PR pattern on the master mold with a periodic line pattern with width and gap of (a) 50  $\mu\text{m}$  and (b) 10  $\mu\text{m}$ , respectively. Optical microscope images of the replicated mold after pre-stretching and subsequent release, showing a reduction of 60% in dimensions of (c) 20- $\mu\text{m}$  and (d) 4- $\mu\text{m}$  periodic line pattern, respectively.
